# Supplementary material
Source: PubMed Central journal article supplement (PMC3020533)
Supplement: supp_77_2_572__1.pdf [file supp_77_2_572__1.pdf]

## Supplemental Material

### Complete biodegradation of 4-fluorocinnamic acid by a consortium of *Arthrobacter* sp. strain G1 and *Ralstonia* sp. strain H1

Syed A. Hasan, Maria Isabel M. Ferreira, Martijn J. Koetsier, Muhammad I. Arif, and  
Dick B. Janssen

*Department of Biochemistry, Groningen Biomolecular Sciences and Biotechnology  
Institute, University of Groningen, Nijenborgh 4, 9747 AG Groningen, the Netherlands*

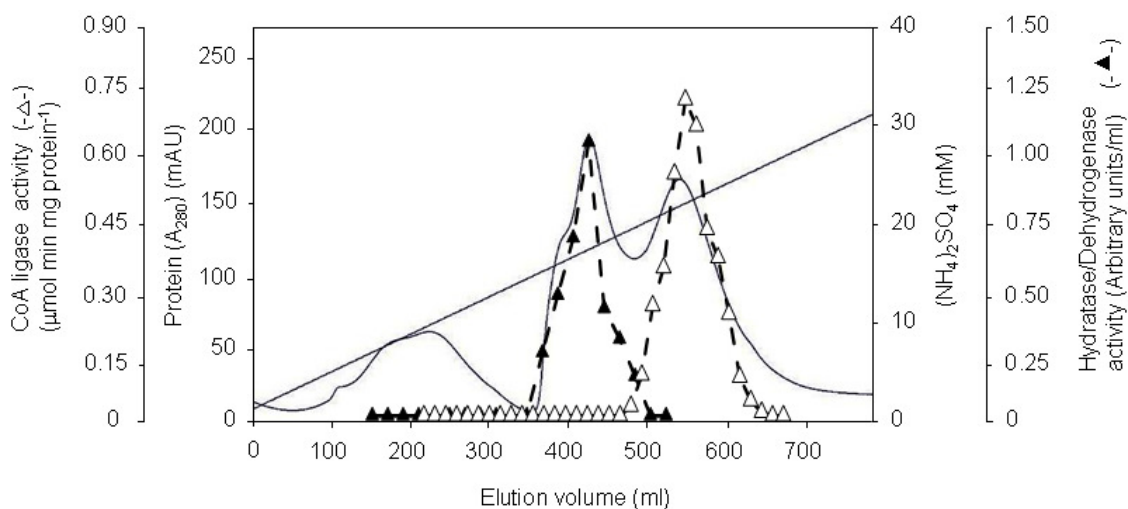

**Fig. S1.** Elution profile of protein ( $A_{280}$ , solid line), 4-fluorocinnamoyl CoA activity ( $-\Delta-$ ) and combined hydratase and dehydrogenase activities ( $-\blacktriangle-$ ) upon Q-Sepharose chromatography of cell-free extract of *Ralstonia* sp. strain H1 cells grown on 4-FCA.

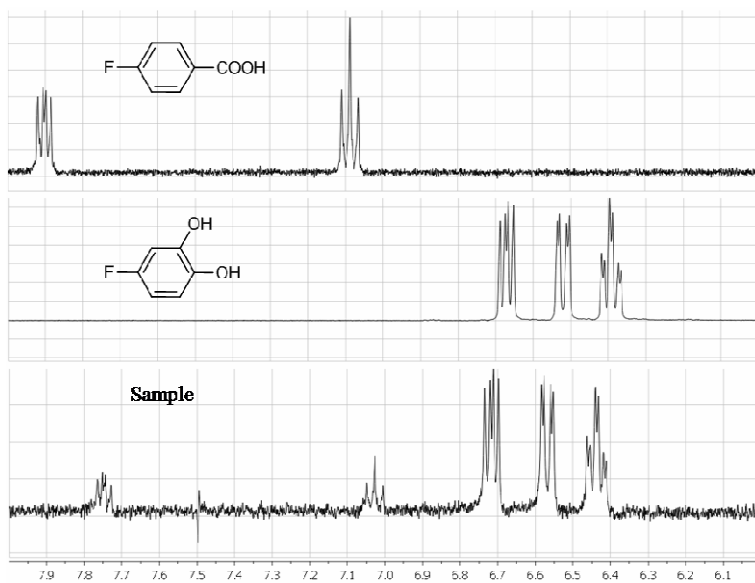

1

2 **Fig. S2.**  $^1\text{H}$  NMR (chemical shifts) of 4-FBA transformation by *Ralstonia* sp. strain H1.

3 Top: starting compound; middle: 4-fluorocatechol standard; bottom, metabolite detected

4 after incubation of resting cells (pregrown in 4-fluorobenzoic acid) with

5 4-fluorocatechol.

6

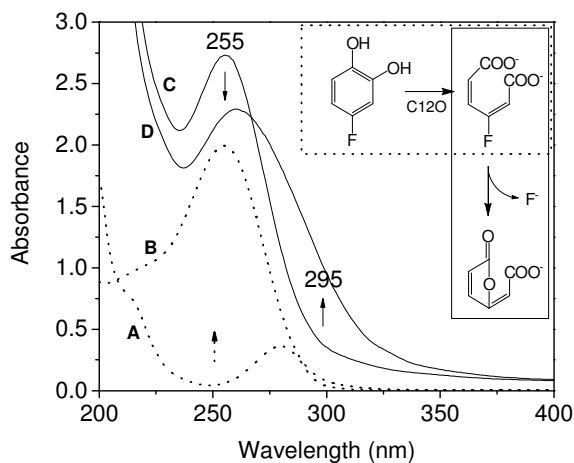

7

8 **Fig. S3.** Transformation of 4-fluorocatechol using partially purified catechol 1,2-

9 dioxygenase (C12O) of *Gordonia* sp. strain SH2 (dotted lines, [2]) and muconate

10 cycloisomerase-containing cell-free extract of *Ralstonia* sp. strain H1 (solid line). In the

11 first step, after addition of 1,2-dioxygenase activity to buffer with 4-fluorocatechol, the

1 increase in absorbance at 255 nm (curves A to B to C) indicates transformation of  
2 4-fluorocatechol to 3-fluoromuconate (1). When cell-free extract of strain H1 was added  
3 to this reaction mixture, absorbance decreased at 255 nm indicates cycloisomerisation to  
4 the weakly absorbing carboxymuconolactone and conversion by a fluoromuconate  
5 cycloisomerase activity, and increased at 295 nm (curves C to D), indicating  
6 cycloisomerization of 3-fluoromuconate (1).

7

## 8 **References**

9

- 10 1. **Dorn, E., and H.-J. Knackmuss.** 1978. Chemical structure and biodegradability of  
11 halogenated aromatic compounds. Substituent effects on 1,2-dioxygenation of  
12 catechol. *Biochem. J.* **174**:85-94.
- 13 2. **Hasan, S.A.** 2010. Degradation of trifluoroacetophenone by the newly isolated  
14 *Gordonia* sp. strain SH2. In: Biodegradation of fluorinated environmental pollutants  
15 under aerobic conditions, PhD thesis, University of Groningen.
